# Supplementary material
Source: PubMed Central journal article supplement (PMC1489364)
Supplement: aem_72_7_4942__1.pdf [file aem_72_7_4942__1.pdf]

## SUPPLEMENTAL MATERIAL

PHENOTYPIC PROPERTIES AND MICROBIAL DIVERSITY OF METHANOGENIC GRANULES FROM A FULL-SCALE UASB REACTOR TREATING BREWERY WASTEWATER.

Running title: Microbial diversity of methanogenic granules

Emiliano E. Díaz<sup>1</sup>, Alfons J. M. Stams<sup>2</sup>, Ricardo Amils<sup>1</sup> and José L. Sanz<sup>1\*</sup>

<sup>1</sup> Department of Molecular Biology, Autonomía University of Madrid, 28049 Madrid, Spain

<sup>2</sup> Laboratory of Microbiology, Wageningen University, 6700 EV Wageningen, The Netherlands

\*: Mailing address: Universidad Autónoma de Madrid, Campus de Cantoblanco, Centro de Biología Molecular, E. Biológicas C-101, 28049 Madrid, España; Phone: 34-914.978.078. Fax: 34-914.978.087. E-mail: [joseluis.sanz@uam.es](mailto:joseluis.sanz@uam.es)

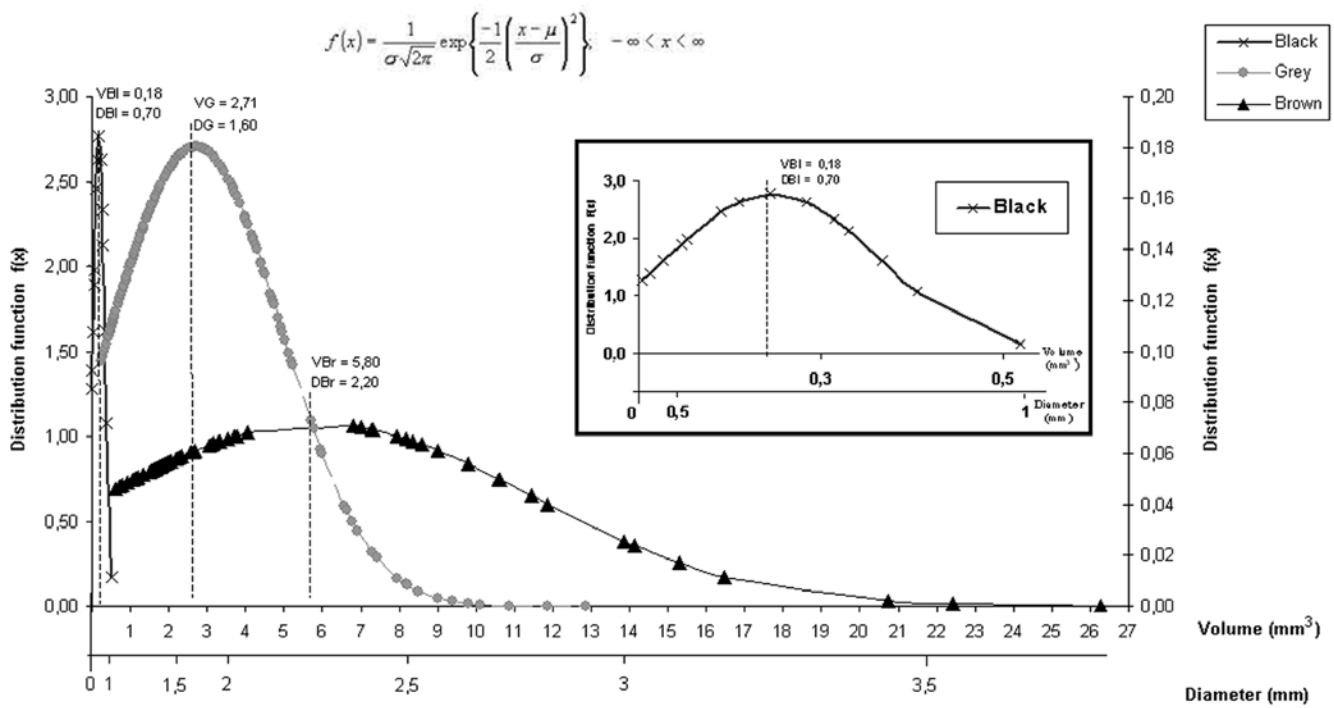

FIG. SM1. Normal distribution by size of the three colour class of granules. The distribution (y axe) is represented both as function of volume (left scale) and diameter (right scale) of the granule. The detail in the square shows the distribution of the black granules. The formula used is shown ( $\sigma$ : standard deviation,  $\mu$  media). V (volume) and D (diameter) medium of BI (black granule), G (grey granule) and Br (brown granule).

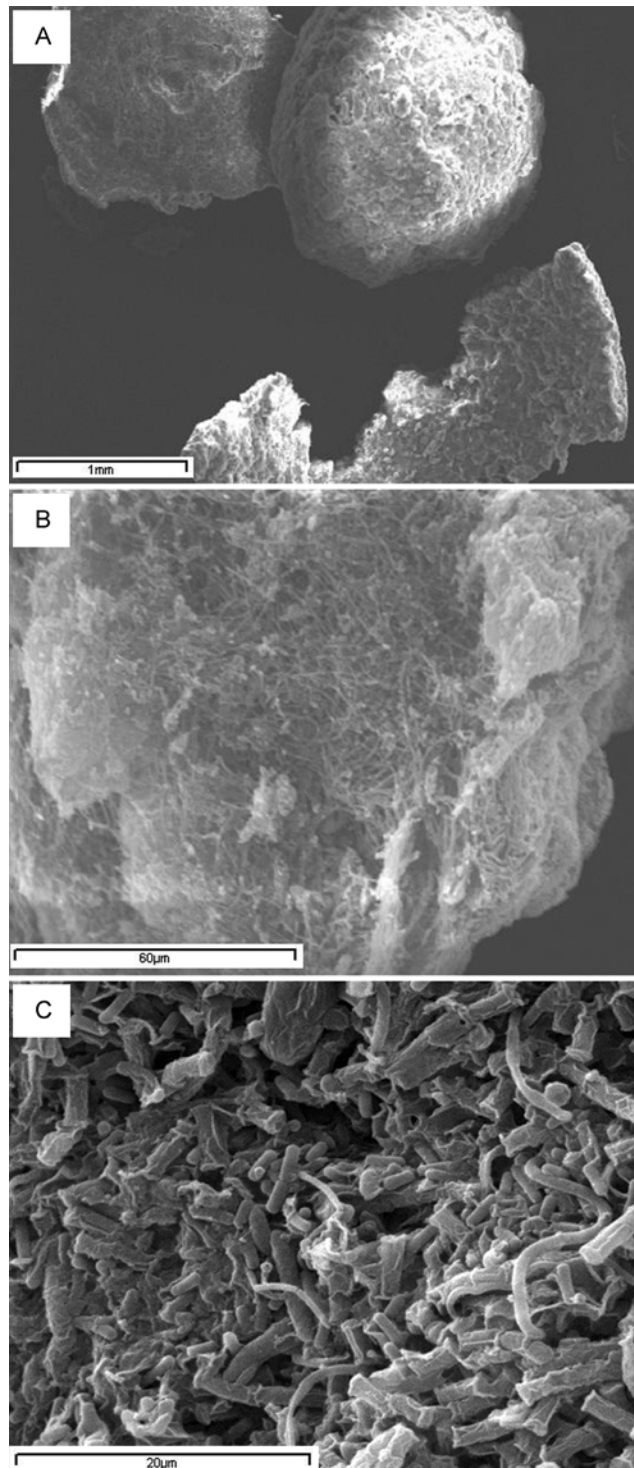

FIG. SM2. Scanning electron microscopy of a brown granule. As a consequence of the differential growth the outer sheath has been detached (A). Note the inner side of the shell cover by stuff of bacteria *Methanosaeta*-like (B). By contrast, the core shows a big microbial biodiversity (C).
